# Supplementary material for: New 3D Supramolecular Framework: Photocatalytic Property and Therapeutic Activity on Orbital Wall Fracture
Source: Hindawi journal article supplement (doi:10.1155/2022/5047263), 2022-05-11
Supplement: f1 [file 5047263.f1.doc]

**Table S1 Selected bond lengths (Å) and angles (°) for 1.**

| **Compound 1** |  |  |  |
| --- | --- | --- | --- |
| Cu(1)-Cl(3) | 2.4423(19) | Cu(1)-Cl(2) | 2.263(2) |
| Cu(1)-Cl(1) | 2.456(2) | Cu(1)-O(1) | 1.897(3) |
| Cu(1)-N(3) | 1.948(5) | Cu(4)-Cl(2) | 2.4541(19) |
| Cu(4)-Cl(6) | 2.340(2) | Cu(4)-Cl(4) | 2.421(2) |
| Cu(4)-O(1) | 1.901(4) | Cu(4)-N(1) | 1.927(5) |
| Cu(3)-Cl(5) | 2.4035(19) | Cu(3)-Cl(1) | 2.4387(19) |
| Cu(3)-Cl(6) | 2.381(2) | Cu(3)-O(1) | 1.915(3) |
| Cu(3)-N(7) | 1.956(5) | Cu(2)-Cl(5) | 2.455(2) |
| Cu(2)-Cl(3) | 2.418(2) | Cu(2)-Cl(4) | 2.339(2) |
| Cu(2)-O(1) | 1.913(4) | Cu(2)-N(5) | 1.949(5) |
| Cl(3)-Cu(1)-Cl(1) | 106.44(8) | Cl(2)-Cu(1)-Cl(3) | 129.64(8) |
| Cl(2)-Cu(1)-Cl(1) | 121.65(8) | O(1)-Cu(1)-Cl(3) | 84.50(12) |
| O(1)-Cu(1)-Cl(2) | 85.99(12) | O(1)-Cu(1)-Cl(1) | 84.50(11) |
| O(1)-Cu(1)-N(3) | 178.74(19) | N(3)-Cu(1)-Cl(3) | 94.26(16) |
| N(3)-Cu(1)-Cl(2) | 95.00(16) | N(3)-Cu(1)-Cl(1) | 95.63(16) |
| Cl(6)-Cu(4)-Cl(2) | 123.41(8) | O(1)-Cu(4)-Cl(2) | 122.79(9) |
| O(1)-Cu(4)-Cl(6) | 110.96(8) | O(1)-Cu(4)-Cl(4) | 83.36(12) |
| O(1)-Cu(4)-N(1) | 86.41(12) | N(1)-Cu(4)-Cl(2) | 83.20(12) |
| N(1)-Cu(4)-Cl(6) | 179.30(19) | N(1)-Cu(4)-Cl(4) | 97.33(17) |
| Cl(5)-Cu(3)-Cl(1) | 118.74(8) | O(1)-Cu(3)-Cl(5) | 84.97(12) |
| O(1)-Cu(3)-Cl(1) | 84.62(11) | O(1)-Cu(3)-Cl(6) | 84.94(12) |
| O(1)-Cu(3)-N(7) | 178.77(18) | N(7)-Cu(3)-Cl(5) | 93.90(16) |
| N(7)-Cu(3)-Cl(1) | 95.53(15) | N(7)-Cu(3)-Cl(6) | 96.09(15) |
| Cl(6)-Cu(3)-Cl(5) | 123.36(8) | Cl(6)-Cu(3)-Cl(1) | 115.49(9) |
| Cl(3)-Cu(2)-Cl(5) | 102.15(7) | Cl(4)-Cu(2)-Cl(5) | 121.14(8) |
| Cl(4)-Cu(2)-Cl(3) | 133.97(9) | O(1)-Cu(2)-Cl(5) | 83.57(12) |
| O(1)-Cu(2)-Cl(3) | 84.84(11) | O(1)-Cu(2)-Cl(4) | 85.23(11) |
| O(1)-Cu(3)-N(5) | 177.8(2) | N(5)-Cu(2)-Cl(5) | 98.41(17) |
| N(5)-Cu(2)-Cl(3) | 93.71(17) | N(5)-Cu(2)-Cl(4) | 94.58(16) |

Table S2. Some previously reported CPs as photocatalysts in the literature.

| **Photocatalyst** | **Irradiation time** | **Efficiency (%)** | **Ref. No.** |
| --- | --- | --- | --- |
| [Ag(4,4′-bipy)(Hntph)]n | 420 min | 42.4 | S1 |
| {[Ag(DCTP)0.5(bpy)(H2O)]0·.5H2O}n | 120 min | 89.5 | S2 |
| [Ag(L)(HNTP)]n | 240 min | 93.5 | S3 |
| {[Ag3(bib)2]·(H3L)2} | 100 min | 63.75 | S4 |
| [Zn2(bbmb)2(tdc)2]·2H2O | 120 min | 87 | S5 |

S1. Y.-Y. Yang, L.-X. Zhou, H.-L. Zhu, W.-Y. Li, Y.-Q. Zheng, Synthesis, crystal structures and photocatalytic properties of four silver(I) coordination polymers based on nitroterephthalic acid, Polyhedron. 148 (2018) 161–170. doi:10.1016/j.poly.2018.04.009.

S2. H.N. Chang, S.X. Hou, Z.C. Hao, G.H. Cui, A one-dimensional Ag(I) coordination polymer as luminescent sensor for detecting Cr2O72− and exhibiting highly photodegradation capacities for methylene blue solution, Polyhedron. 141 (2018) 276–283. doi:10.1016/j.poly.2017.11.014.

S3. H. Zhu, D. Liu, Y.-H. Li, G.-H. Cui, A 1D silver(I) coordination polymer as luminescent probe for Cu2+ and effective photocatalyst for degradation organic dyes, Inorg. Chem. Commun. 108 (2019) 107539. doi:10.1016/j.inoche.2019.107539.

S4. Z.-C. Yin, M. Yang, S.W. Gosavi, A. Kumar Singh, R. Chauhan, J.-C. Jin, A 3D supramolecular Ag(I)-based coordination polymer as stable photocatalyst for dye degradation, Inorg. Chem. Commun. 131 (2021) 108805. doi:10.1016/j.inoche.2021.108805.

S5. W.-C. Kang, C. Han, D. Liu, G.-H. Cui, A bifunctional benzimidazole-based luminescent Zn(II) coordination polymer for detection of Hg2+ and photocatalytic degrading of methylene blue, Inorg. Chem. Commun. 106 (2019) 81–85. doi:10.1016/j.inoche.2019.05.034.


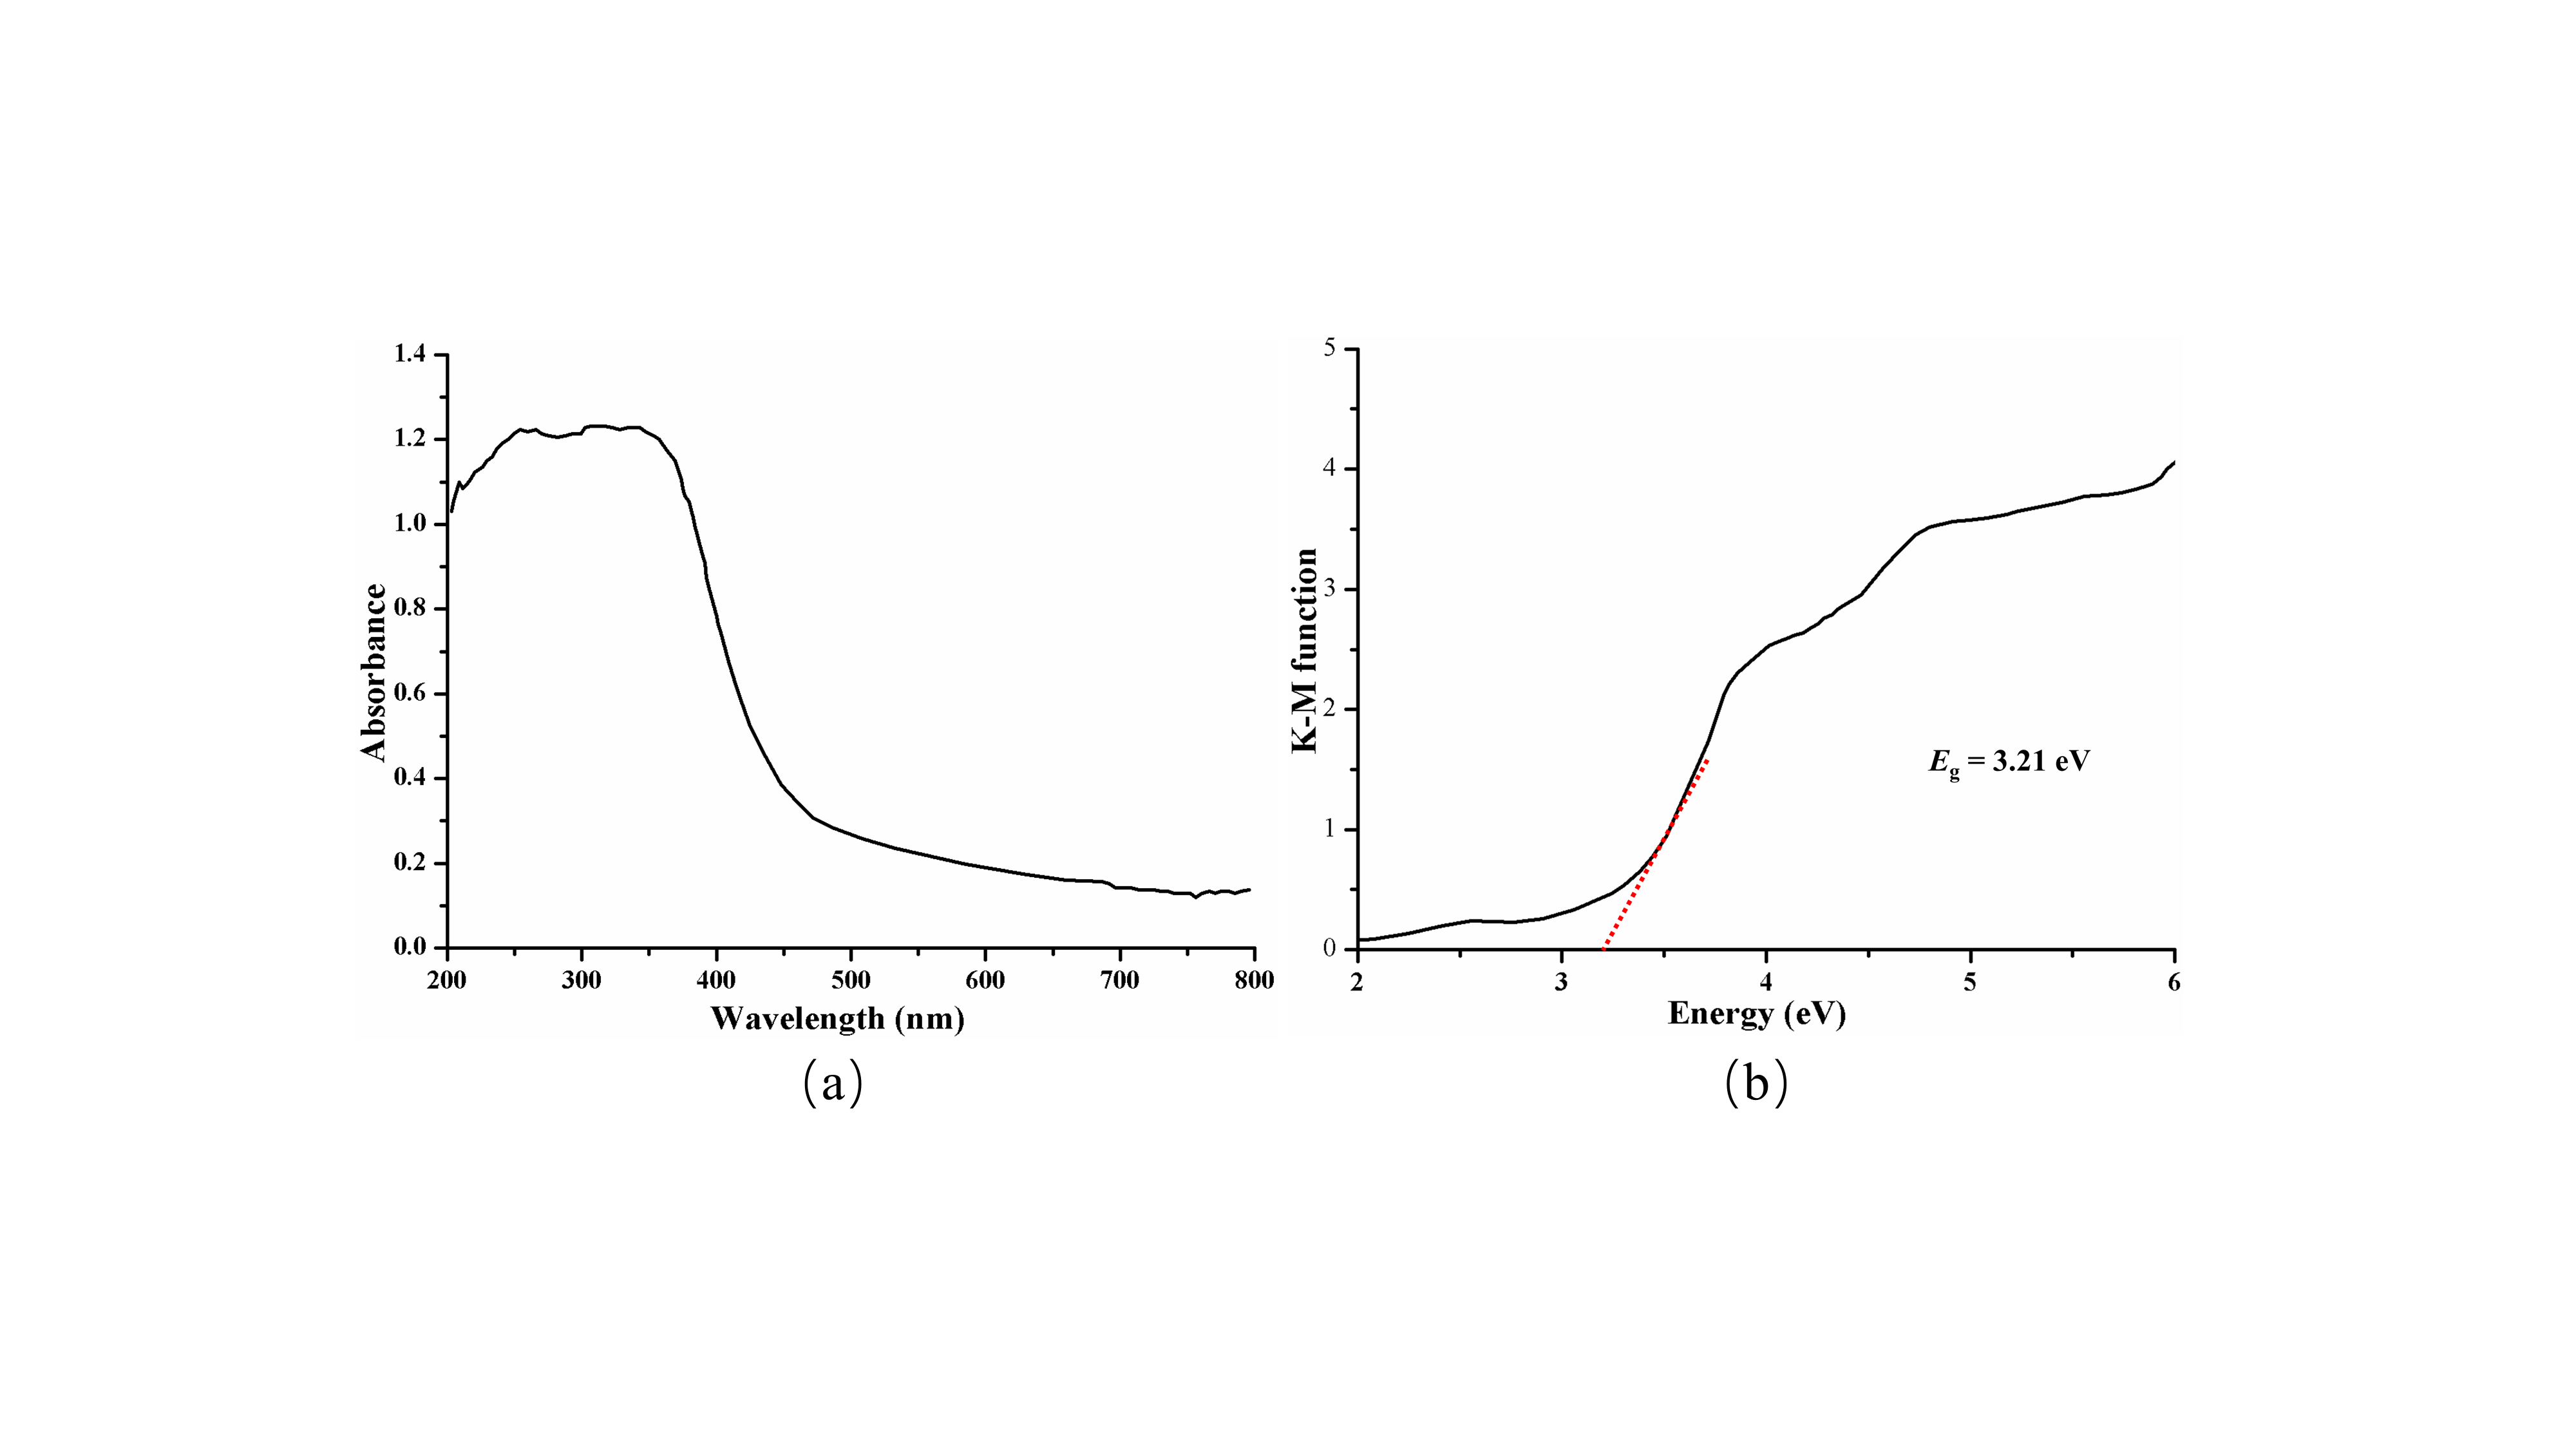


Fig. S1. (a) The solid-state UV−vis absorption spectrum of **1** at room temperature. (b) Diffuse reflectance spectrum of Kubelka-Munk function versus energy of for **1**.


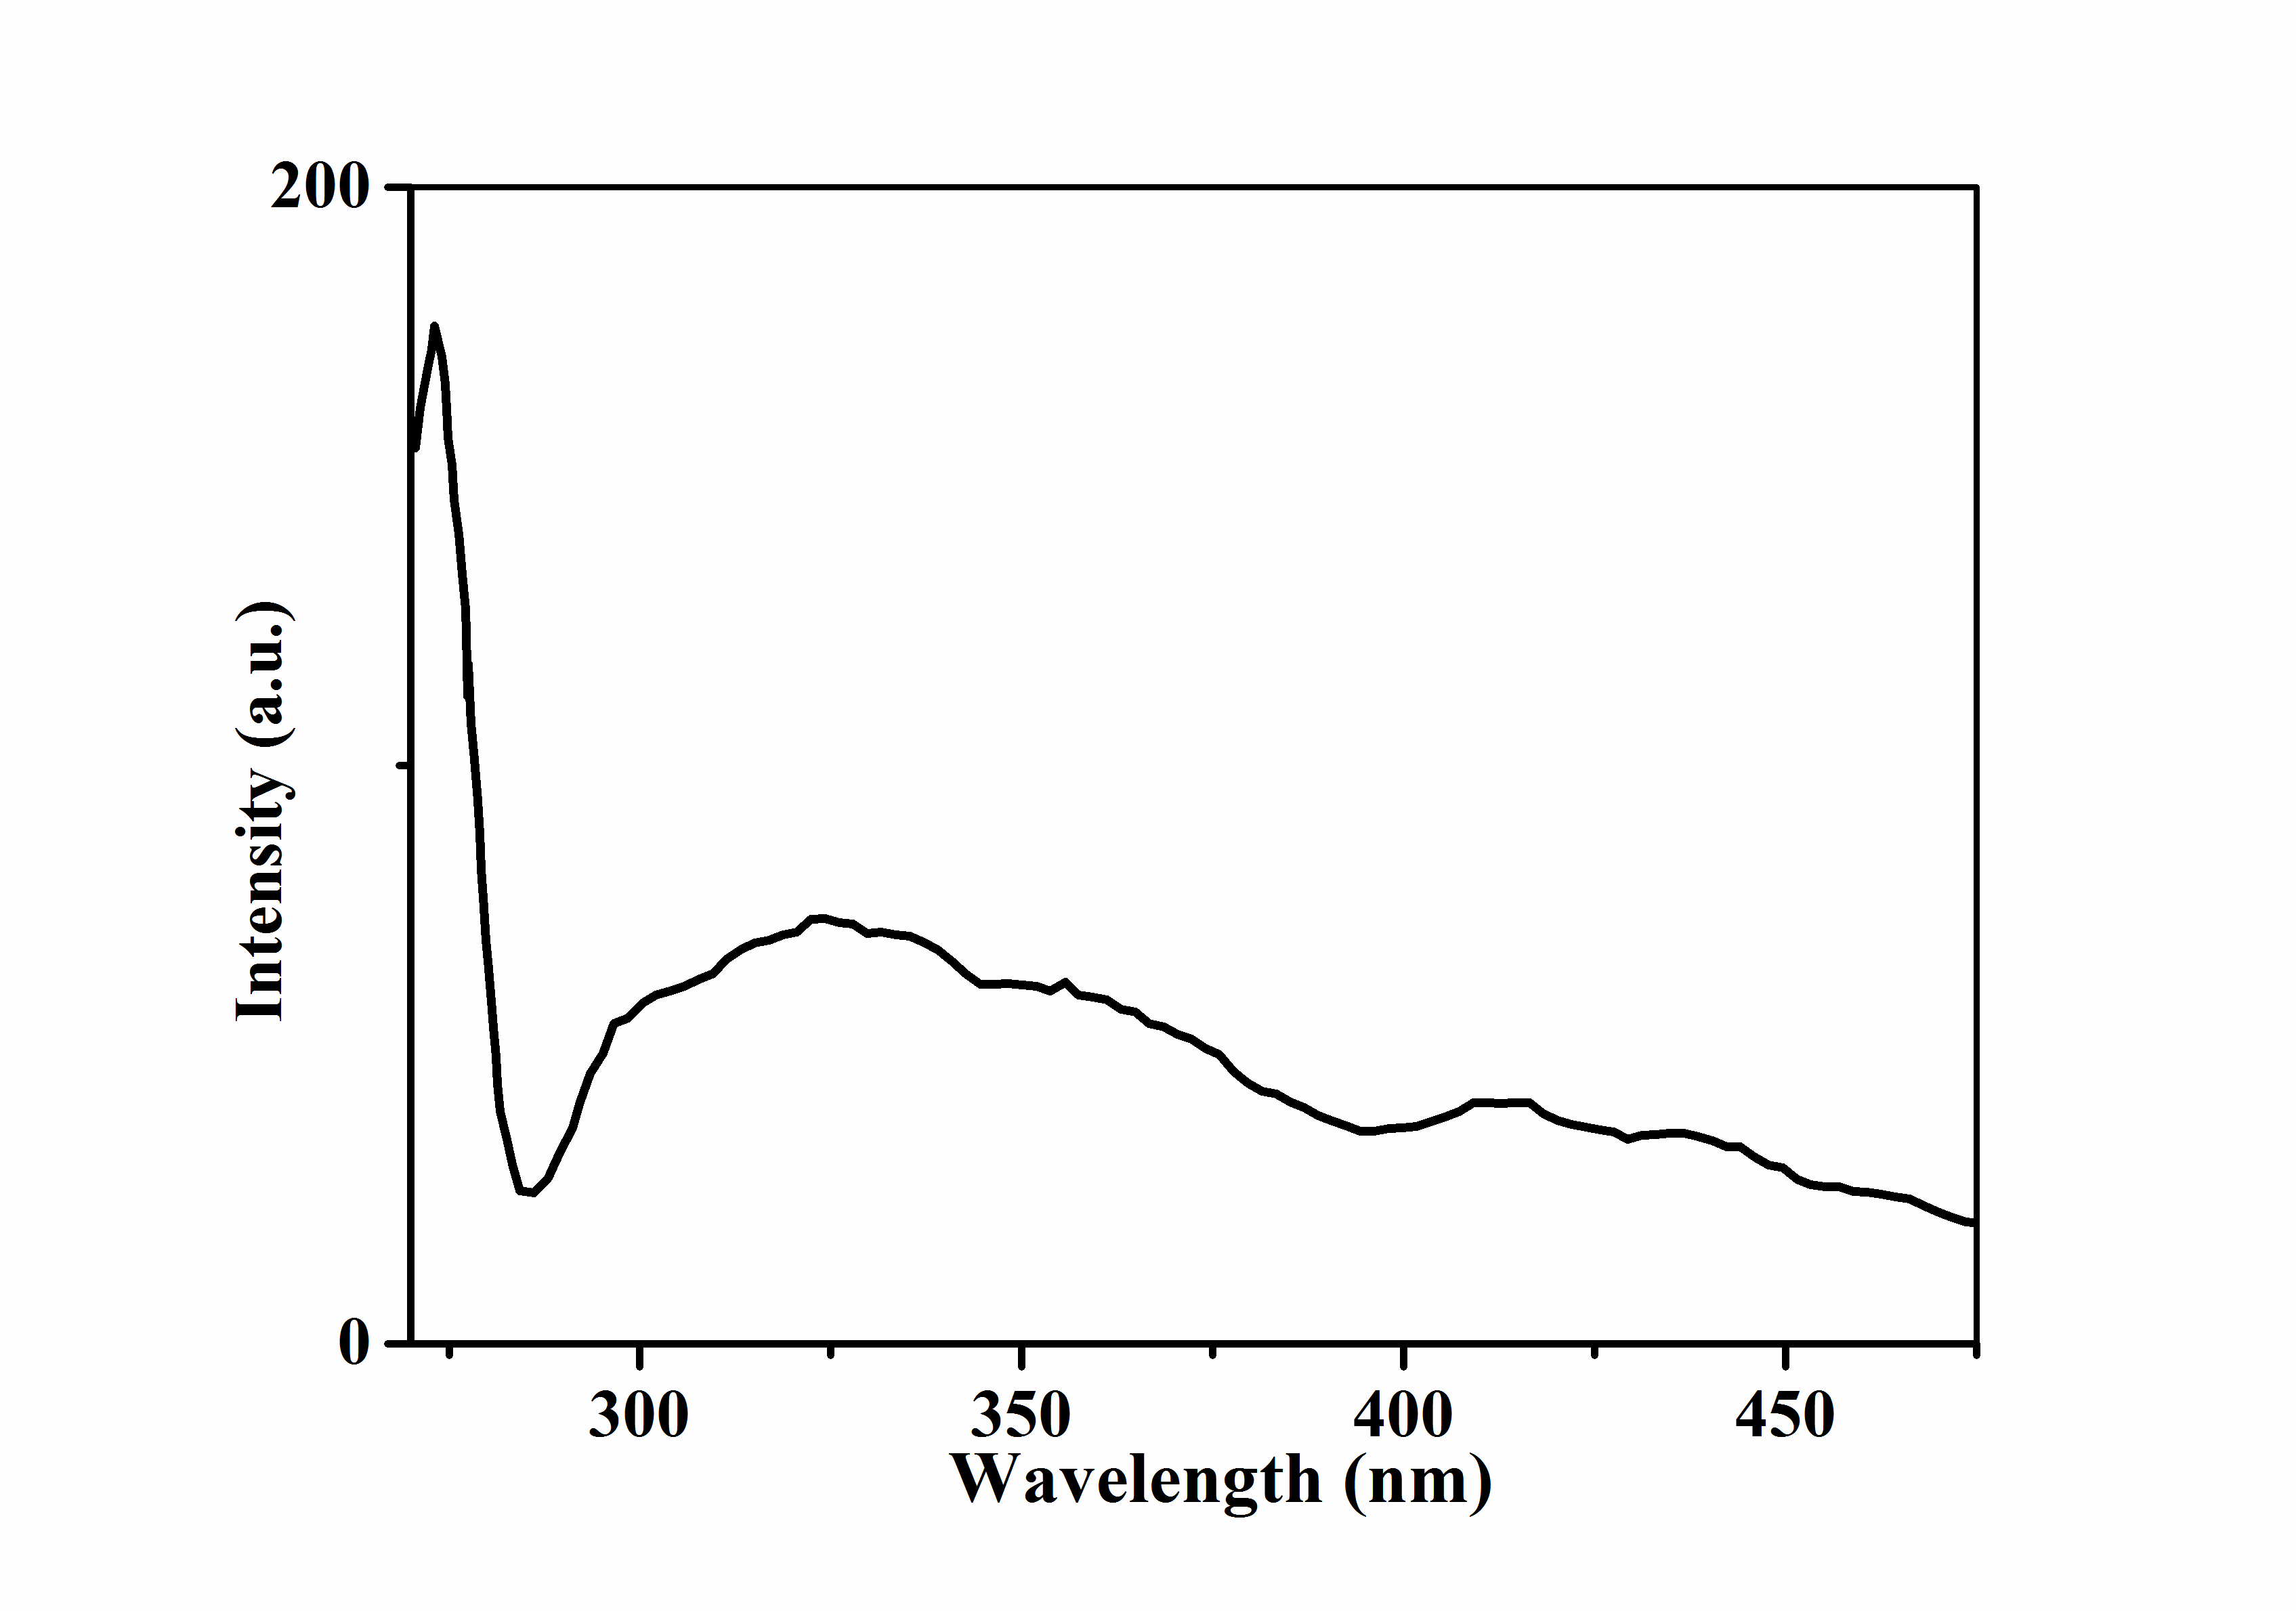


Fig S2. The fluorescence spectrum of **1**.
